# Supplementary material for: Microwave-Assisted Extraction of Anticancer Flavonoid, 2′,4′-Dihydroxy-6′-methoxy-3′,5′-dimethyl Chalcone (DMC), Rich Extract from Syzygium nervosum Fruits
Source: MDPI journal article supplement (doi:10.3390/molecules27041397), 2022-02-18
Supplement: s1 [file s1]

# Supplementary Material

## Microwave-Assisted Extraction of Anticancer Flavonoid, 2',4'-Dihydroxy-6'-Methoxy-3',5'-Dimethyl Chalcone (DMC), Rich Extract from *Syzygium Nervosum* Fruits

**Vachira Choommongkol**<sup>1</sup>, **Khanittha Punturee**<sup>2</sup>, **Piyatida Klumphu**<sup>1</sup>, **Parintip Rattanaburi**<sup>3</sup>, **Puttinan Meepowpan**<sup>4,5</sup> and **Panawan Suttiarporn**<sup>6,\*</sup>

<sup>1</sup> Department of Chemistry Faculty of Science, Maejo University, Chiang Mai 50290, Thailand; vachira@mju.ac.th and piyatida\_kp@mju.ac.th

<sup>2</sup> Cancer Research Unit of Associated Medical Sciences (AMS-CRU), Faculty of Associated Medical Sciences, Chiang Mai University, Chiang Mai 50200, Thailand; khanittha.taneyhill@cmu.ac.th

<sup>3</sup> Department of General Science, Faculty of Education, Nakhon Si Thammarat Rajabhat University, Nakhon Si Thammarat 80280, Thailand; parintip\_rat@nstru.ac.th

<sup>4</sup> Department of Chemistry, Faculty of Science, and Graduate School, Chiang Mai University, Chiang Mai 50200, Thailand p.meepowpan@cmu.ac.th

<sup>5</sup> Center of Excellence in Materials Science and Technology, Faculty of Science, Chiang Mai University, Chiang Mai 50200, Thailand; p.meepowpan@cmu.ac.th

<sup>6</sup> Faculty of Science, Energy and Environment, King Mongkut's University of Technology North Bangkok, Rayong campus 21120, Thailand; panawan.s@sciee.kmutnb.ac.th\*

\*Corresponding author: panawan.s@sciee.kmutnb.ac.th

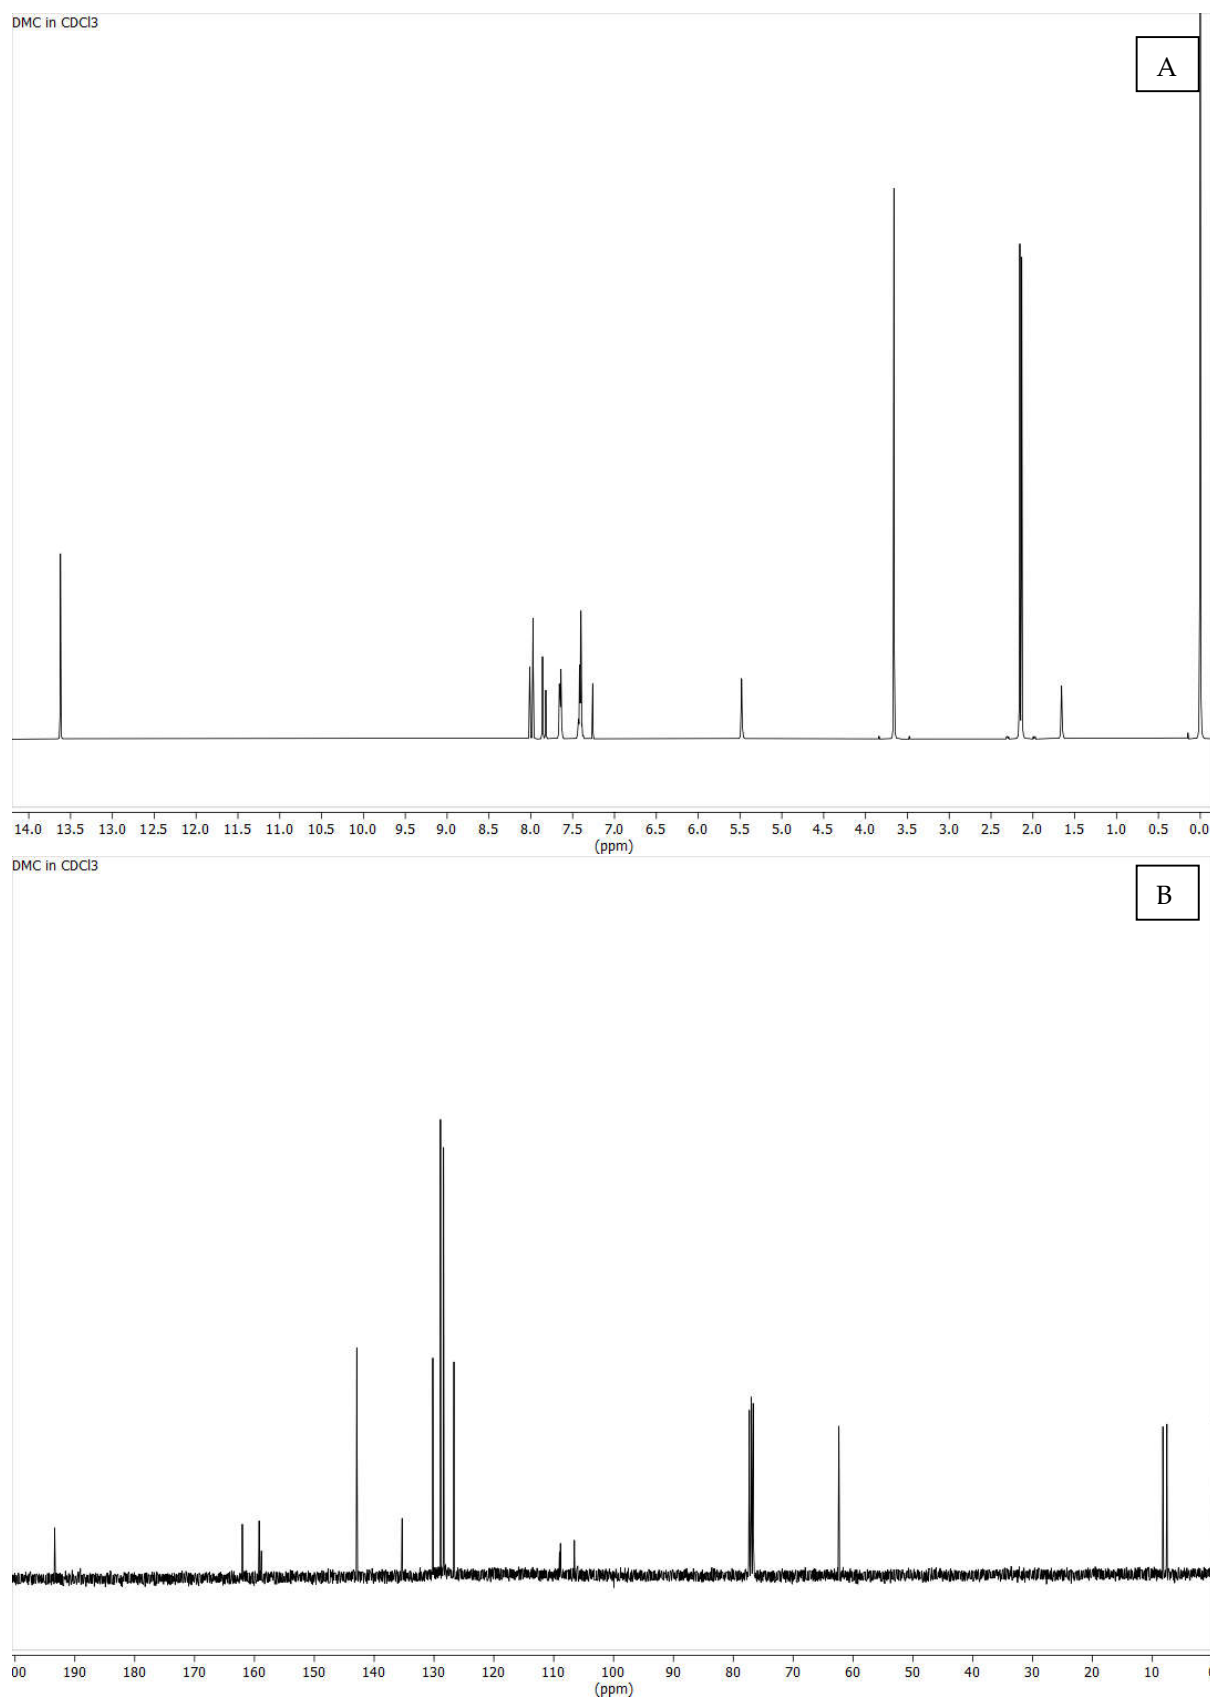

**Figure S1.** (A)  $^1\text{H}$ -NMR and (B)  $^{13}\text{C}$ -NMR spectrum of DMC

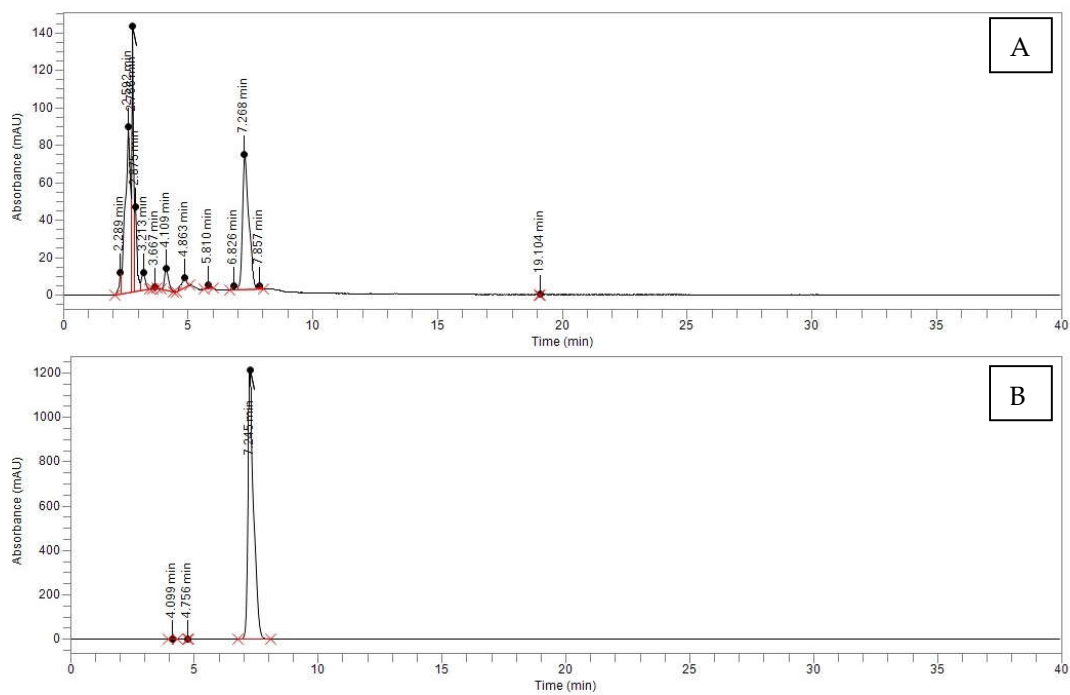

**Figure S2.** HPLC Chromatogram of (A) DMC-rich extract and (B) standard of DMC
